# Supplementary material for: Frailty among Older People during the First Wave of the COVID-19 Pandemic in The Netherlands
Source: MDPI journal article supplement (doi:10.3390/ijerph19063669), 2022-03-19
Supplement: s1 [file s1]

Table S1. Items and scores of the GFI in the Lifelines Covid-19 questionnaire

| Item no. | GFI-items                                                                                                                                                                                                                  | GFI-items in Lifelines Covid-19 questionnaire                                                                                                                                                                              |
|----------|----------------------------------------------------------------------------------------------------------------------------------------------------------------------------------------------------------------------------|----------------------------------------------------------------------------------------------------------------------------------------------------------------------------------------------------------------------------|
| 1        | Can you independently perform the following activities without any help from someone else, possibly with the help of a cane, walker or wheelchair?<br>Get groceries and run errands<br><i>Yes = 0; No = 1</i>              | Can you independently perform the following activities without any help from someone else, possibly with the help of a cane, walker or wheelchair?<br>Get groceries and run errands<br><i>Yes = 0; No = 1</i>              |
| 2        | Can you independently perform the following activities without any help from someone else, possibly with the help of a cane, walker or wheelchair?<br>Get dressed/undressed<br><i>Yes = 0; No = 1</i>                      | Can you independently perform the following activities without any help from someone else, possibly with the help of a cane, walker or wheelchair?<br>Get dressed/undressed<br><i>Yes = 0; No = 1</i>                      |
| 3        | Can you independently perform the following activities without any help from someone else, possibly with the help of a cane, walker or wheelchair?<br>Move outdoors (around house, to neighbors)<br><i>Yes = 0; No = 1</i> | Can you independently perform the following activities without any help from someone else, possibly with the help of a cane, walker or wheelchair?<br>Move outdoors (around house, to neighbors)<br><i>Yes = 0; No = 1</i> |
| 4        | Can you independently perform the following activities without any help from someone else, possibly with the help of a cane, walker or wheelchair?<br>Go the toilet<br><i>Yes = 0; No = 1</i>                              | Can you independently perform the following activities without any help from someone else, possibly with the help of a cane, walker or wheelchair?<br>Go the toilet<br><i>Yes = 0; No = 1</i>                              |
| 5        | What score would give your physical fitness (from 0 to 10)<br><i>0-6=1; 7-10 = 0</i>                                                                                                                                       | What score would give your physical fitness (from 0 to 10)<br><i>0-6=1; 7-10 = 0</i>                                                                                                                                       |
| 6        | Do you have problems in every day life due to poor vision?<br><i>Yes = 1; No = 0</i>                                                                                                                                       | Do you have problems in every day life due to poor vision?<br><i>Yes = 1; No = 0</i>                                                                                                                                       |
| 7        | Do you have problems in every day life due to poor hearing?<br><i>Yes = 1; No = 0</i>                                                                                                                                      | Do you have problems in every day life due to poor hearing?<br><i>Yes = 1; No = 0</i>                                                                                                                                      |
| 8        | Have you lost a lot of weight in the past period without wanting to (6 kg in 6 months or 3 kg in one month)?<br><i>Yes = 1; No = 0</i>                                                                                     | Have you lost a lot of weight in the past period without wanting to (6 kg in 6 months or 3 kg in one month)?<br><i>Yes = 1; No = 0</i>                                                                                     |
| 9        | Do you take 4 or more different types of medicine?<br><i>Yes = 1; No = 0</i>                                                                                                                                               | Number of different medicines from the medication checklist.<br><i>≥4 = 1; &lt;4 = 0</i>                                                                                                                                   |
| 10       | Do you have memory problems?<br><i>Yes = 1; No/sometimes = 0</i>                                                                                                                                                           | Do you have memory problems?<br><i>Yes = 1; No/sometimes = 0</i>                                                                                                                                                           |
| 11       | Do you ever experience emptiness around you?<br><i>Sometimes/yes = 1; No = 0</i>                                                                                                                                           | How often do you feel disconnected from others in the last 7 days?<br><i>Sometimes/often = 1; Almost never/never = 0</i>                                                                                                   |
| 12       | Do you ever miss people around you?<br><i>Sometimes/yes = 1; No = 0</i>                                                                                                                                                    | How often did you feel alone in the past 7 days?<br><i>Sometimes/often = 1; Almost never/never = 0</i>                                                                                                                     |
| 13       | Do you ever feel let down?<br><i>Sometimes/yes = 1; No = 0</i>                                                                                                                                                             | How often did you feel let down in the past 7 days?<br><i>Sometimes/often = 1; Almost never/never = 0</i>                                                                                                                  |

Online Supplement 1. continued

| Item no. | GFI-items                                                                       | GFI-items in Lifelines Covid-19 questionnaire                                                                                                                                                                                                                                                                                                                                                                     |
|----------|---------------------------------------------------------------------------------|-------------------------------------------------------------------------------------------------------------------------------------------------------------------------------------------------------------------------------------------------------------------------------------------------------------------------------------------------------------------------------------------------------------------|
| 14       | Have you felt gloomy or depressed recently?<br><i>Sometimes/yes = 1; No = 0</i> | During the past seven days, have you felt constantly depressed or depressed for most of the day, almost every day?<br><i>Yes = 1; No = 0</i>                                                                                                                                                                                                                                                                      |
| 15       | Have you felt nervous or afraid recently?<br><i>Sometimes/yes = 1; No = 0</i>   | a. In the past seven days, have you often felt restless, loaded or nervous?<br><i>Yes = 1; No = 0</i><br>b. In the past seven days, have you been worrying excessively and worried about multiple daily life problems of work, of home or about your immediate environment?<br><i>Yes = 1; No = 0</i><br><i>Both items yes = yes; 1 item yes = sometimes; 2 items no = no</i><br><i>Sometimes/yes = 1; No = 0</i> |

Items not shaded gray are identical to the original GFI in the Lifelines Covid-19 questionnaire.

Items shaded gray are not identical to the original GFI in the Lifelines Covid-19 questionnaire.
